# Supplementary material
Source: PubMed Central journal article supplement (PMC2657369)
Supplement: 0812584106_0812584106SI.pdf [file 0812584106_0812584106SI.pdf]

# Supporting Information

Montes et al. 10.1073/pnas.0812584106

## SI Methods

C3 was prepared from pooled human plasma. Plasma was subjected to a 4–12% cut with PEG4000, the pellet solubilized in 10 mM Na/K phosphate, pH 7.6/5 mM NaCl, and applied to a DEAE-Sepharose anion exchange column attached to an Akta Prime (GE Healthcare). Protein was fractionated on a salt gradient to 0.5M NaCl, C3-containing fractions were identified by SDS/PAGE, dialyzed into 20 mM Na/K phosphate, pH 6/60 mM NaCl, and applied to a Source S cation exchange column (GE Healthcare). Protein was eluted with a gradient to 0.5M NaCl. C3-containing fractions were pooled, concentrated, and aggregates were removed by gel filtration on Superdex 200 preparative grade matrix in a XK16/70 column attached to an Akta Purifier (GE Healthcare).

Factor (f)B was purified from plasma of healthy volunteers homozygous for each fB variant by affinity chromatography on an anti-Bb column (mAb JC1 made in-house; 5 mL HiTrap column; GE Healthcare). Eluted fB was gel filtered on Superdex 200 to remove aggregated material and minor contaminants, and to buffer exchange into Biacore buffer (10 mM Hepes, pH 7.4/0.005% surfactant P20/1 mM Mg<sup>2+</sup> with either 50 or 150 mM

NaCl) for kinetic analyses, or C fixation diluent (CFD; Oxoid) for hemolysis assays. In some experiments (Fig. S1), fB<sub>32R</sub> and fB<sub>32Q</sub> variants were copurified by affinity chromatography from plasma of heterozygote individuals, and subsequently separated by ion exchange on either Mono S or Mono Q columns at pH 6.0. Factor B<sub>32R</sub> eluted first from the Mono Q column, and last from the Mono S. Pooled protein was gel filtered into required buffers as described above. C3b was generated by incubating C3, fB, and fD in CFD until total C3 cleavage had occurred. C3b was purified from other fragments by anion exchange chromatography (Mono Q; GE Healthcare). C3b-containing fractions were pooled, concentrated, and fractionated on Superdex 200 to separate C3b monomer from dimer. To generate Ba, 19 mg methylamine-treated C3 (1) was coupled to a 5 mL Hitrap column; fB (5 mg; 2 mg/mL) and fD (100 ng/mL) were applied to the column in CFD, and incubated for 1 h at 37 °C. The column was eluted in CFD and eluate applied to the anti-Bb affinity column. Bb was retained on the column; Ba in the run-through was concentrated by ultrafiltration, and buffer-exchanged into Biacore buffer (50 mM NaCl) by gel filtration on Superdex 200.

1. Harris CL (2000) Functional assays for complement regulators. *Methods Mol Biol* 150:83–101.



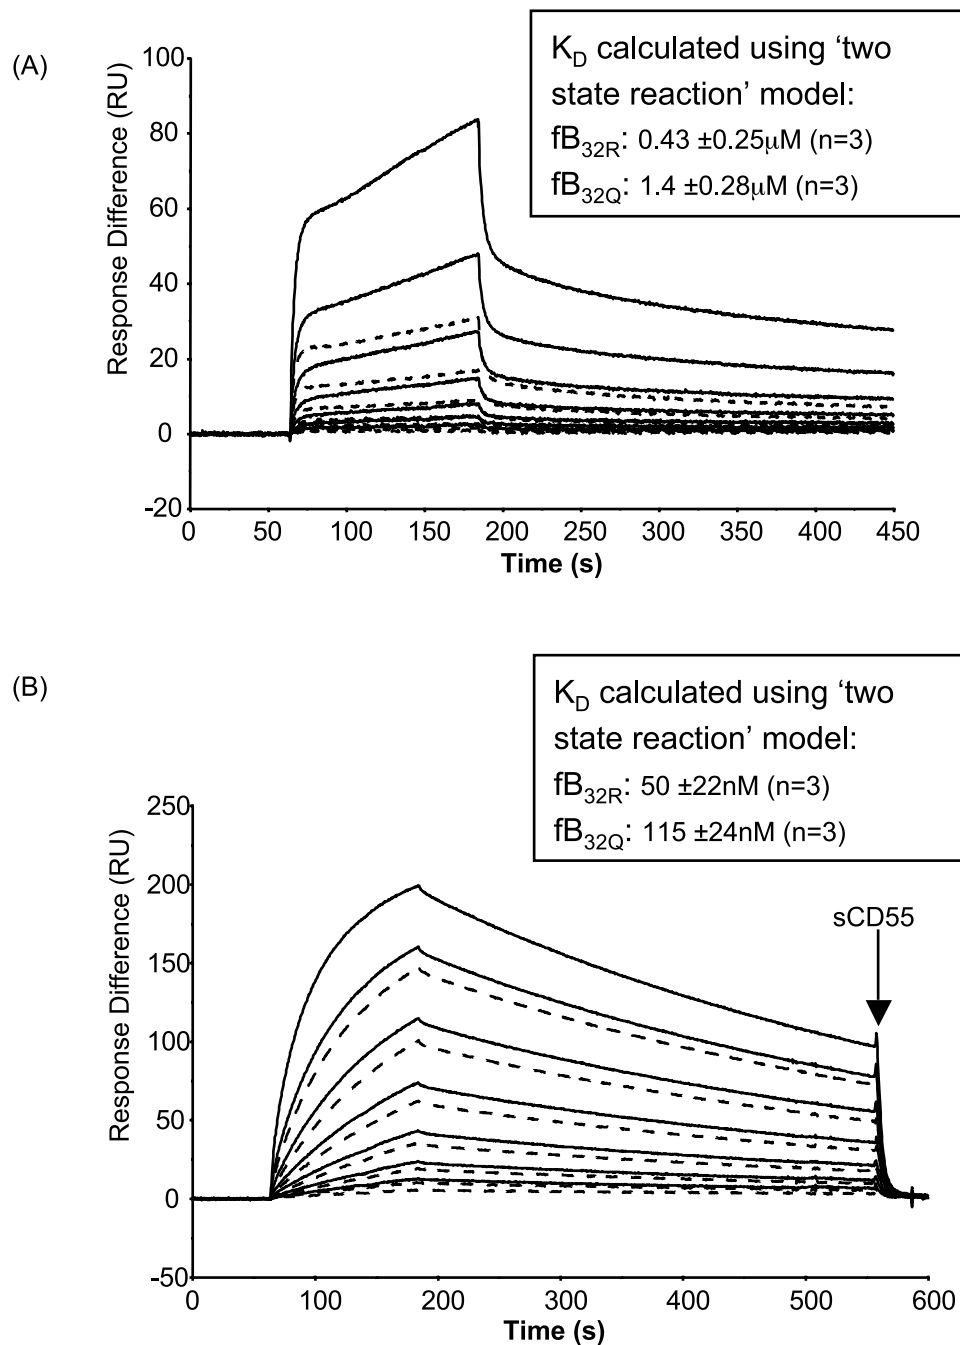

**Fig. S2.** SPR analysis of proenzyme and convertase formation by native fB in physiological salt concentrations. (A) Plasma-purified fB was flowed over the surface of the C3b-coated chip at concentrations between  $1.1 \mu M$  and  $18 nM$  in Biacore buffer containing physiological salt concentration ( $10 mM$  Hepes, pH 7.4/ $150 mM$  NaCl/ $1 mM$  MgCl<sub>2</sub>/ $0.005\%$  surfactant P20). Sensorgrams from  $fB_{32R}$  are solid lines,  $fB_{32Q}$  are dotted lines; identical concentrations are indicated for the 2 variants.  $K_D$  calculated using "2-state reaction" model:  $fB_{32R}$ ,  $0.43 \pm 0.25 \mu M$ ; and  $fB_{32Q}$ ,  $1.4 \pm 0.28 \mu M$ . (B) Plasma-purified fB was flowed over the surface of the C3b-coated chip at concentrations between  $1.1 \mu M$  and  $18 nM$  in the presence of  $1 \mu g/mL$  fD.  $K_D$  calculated using 2-state reaction model:  $fB_{32R}$ ,  $50 \pm 22 nM$ ; and  $fB_{32Q}$ ,  $115 \pm 24 nM$ . Analysis using a 1:1 Langmuir model revealed similar affinities of  $51 \pm 21 nM$  ( $fB_{32R}$ ) and  $113 \pm 26 nM$  ( $fB_{32Q}$ ). Affinities in A and B are the means  $\pm$  SD of 3 independent experiments.
